# Neural markers of suppression in impaired binocular vision

Freya A. Lygo<sup>1,2</sup>, Bruno Richard<sup>3</sup>, Alex R. Wade<sup>1,5</sup>,  
Antony B. Morland<sup>1,5</sup>, Robert F. Hess<sup>4</sup>, & Daniel H. Baker<sup>1,5,6</sup>

1. Department of Psychology, University of York, Heslington, York, UK
2. Institute of Cognitive Neuroscience, University College London, London, UK
3. Department of Mathematics and Computer Science, Rutgers University–Newark, Newark, New Jersey, USA
4. McGill Vision Research, Dept. Ophthalmology, McGill University, Montreal, QC, Canada
5. York Biomedical Research Institute, University of York, Heslington, York, UK
6. Corresponding author: [daniel.baker@york.ac.uk](mailto:daniel.baker@york.ac.uk)

## **Precis** (35 words)

Evidence of atypical interocular suppression in individuals with impaired binocular vision was obtained using EEG and fMRI, with a single experimental paradigm. This may underlie the deficits in stereopsis experienced by treated amblyopes.

*Keywords:* interocular suppression; dichoptic; fMRI; SSVEP; V1

**Financial support:** This work was supported in part by a Wellcome Trust (ref: 105624) grant, through the Centre for Chronic Diseases and Disorders (C2D2) at the University of York. FL was funded by a PhD student from the University of York. The sponsor or funding organization had no role in the design or conduct of this research.

**Conflict of interest:** No conflicting relationship exists for any author

**Running head:** Suppression in impaired binocular vision

This article contains additional online-only material. The following should appear online-only: Figure S1, Figure S2.

35 **Abstract**

36

37 Objective/Purpose: Even after conventional patching treatment, individuals with a history of  
38 amblyopia typically lack good stereo vision. This is often attributed to atypical suppression  
39 between the eyes, yet the specific mechanism is still unclear. Guided by computational models of  
40 binocular vision, we tested explicit predictions about how neural responses to contrast might differ  
41 in individuals with impaired binocular vision.

42

43 Design: A  $5 \times 5$  factorial repeated measures design was used, in which all participants completed  
44 a set of 25 conditions (stimuli of different contrasts shown to the left and right eyes).

45

46 Participants: 25 individuals with a history of amblyopia, and 19 control participants with typical  
47 visual development, participated in the study.

48

49 Methods: Neural responses to different combinations of contrast in the left and right eyes, were  
50 measured using both electroencephalography (EEG) and functional magnetic resonance imaging  
51 (fMRI). Stimuli were sinusoidal gratings with a spatial frequency of 3c/deg, flickering at 4Hz. In  
52 the fMRI experiment, we also ran population receptive field and retinotopic mapping sequences,  
53 and a phase-encoded localiser stimulus, to identify voxels in primary visual cortex (V1) sensitive  
54 to the main stimulus.

55

56 Main outcome measures: The main outcome measures were the signal-to-noise ratio of the  
57 steady state visual evoked potential, and the fMRI  $\beta$  weights from a general linear model.

58

59 Results: Neural responses generally increased monotonically with stimulus contrast. When  
60 measured with EEG, responses were attenuated in the weaker eye, consistent with a fixed tonic  
61 suppression of that eye. When measured with fMRI, a low contrast stimulus in the weaker eye  
62 substantially reduced the response to a high contrast stimulus in the stronger eye. This effect was  
63 stronger than when the stimulus-eye pairings were reversed, consistent with unbalanced dynamic  
64 suppression between the eyes.

65

66 Conclusions: Measuring neural responses using different methods leads to different conclusions  
67 about visual differences in individuals with impaired binocular vision. Both of the atypical  
68 suppression effects may relate to binocular perceptual deficits, e.g. in stereopsis, and we  
69 anticipate that these measures could be informative for monitoring the progress of treatments  
70 aimed at recovering binocular vision.

71

## 72 Introduction

73

74 The binocular visual system is exquisitely sensitive, and has the ability to detect differences  
75 (disparities) between the eyes of well below one minute of arc<sup>1</sup>. This results in a vivid perception  
76 of depth from stereopsis<sup>2</sup> that benefits everyday tasks such as fine motor control (e.g. threading  
77 a needle) and the judgement of relative object distance (e.g. during driving). But in a substantial  
78 minority of individuals (around 1.4%<sup>3</sup>), an optical (e.g. anisometropia) or muscular (e.g.  
79 strabismus) asymmetry between the eyes during childhood disrupts the development of binocular  
80 vision. This can lead to amblyopia, in which vision through the affected eye is significantly  
81 impaired<sup>4</sup>. Such problems can be treated to some extent by orthoptic or surgical interventions,  
82 which recover sensitivity in the weaker eye in a proportion of cases<sup>5</sup>. But even if treatment is  
83 successful in improving vision in the amblyopic eye, binocular vision may not be restored and  
84 stereopsis rarely reaches normal levels<sup>6</sup>. An enduring mystery is the identity of the neural  
85 mechanism that disrupts binocular vision, even in situations where the eyes have similar acuity  
86 and sensitivity.

87

88 In clinical practice, binocular visual disturbances in amblyopia are typically attributed to a process  
89 of suppression, whereby the fellow eye suppresses signals from the amblyopic eye<sup>7,8,9</sup>. This  
90 suppression could take several different forms. For example, 'tonic' suppression should persist  
91 even when there is no input to the fellow eye (e.g. if it is closed, patched or pressure blinded, or  
92 simply shown a blank display). This amounts to a fixed attenuation of the signal in the amblyopic  
93 eye that is invariant to signals from the fellow eye<sup>10</sup>. Alternatively, a more 'dynamic' form of  
94 suppression would depend on the current stimulation of the two eyes, such that higher contrasts  
95 in one eye produce greater suppression of the other eye. Interocular suppression has been widely  
96 studied in intact binocular vision, and has several perceptual consequences, such as ocularity  
97 invariance (the observation that our general perception of the world is unchanged whether one or  
98 both eyes are open<sup>11</sup>) and binocular rivalry (the alternation in perception between conflicting  
99 images shown to the two eyes<sup>12</sup>). Impaired binocular vision might result from an imbalance of  
100 these existing processes of interocular suppression.

101

102 Distinguishing between these, and other, explanations for binocular impairments has proved  
103 challenging. In some psychophysical paradigms, such as dichoptic contrast discrimination, similar  
104 performance can result even over a wide range of relative amounts of suppression between the  
105 eyes<sup>10</sup>. In other paradigms, tonic and dynamic suppression are equally able to account for the  
106 results<sup>13</sup>. Isolating a direct neural measure of suppression would allow us to distinguish between  
107 different models, and potentially provide an objective index of binocular impairment that could be  
108 used to track improvements during treatment. In the present study we measured visual responses  
109 to stimuli of different contrasts directly with two methods: functional magnetic resonance imaging  
110 (fMRI) and electroencephalography (EEG). These methods have complementary strengths and  
111 weaknesses: fMRI has excellent spatial precision, but poor temporal resolution, whereas EEG  
112 has poor spatial precision, but good temporal resolution. Previous work measuring visual  
113 responses in amblyopia with one or other of these methods has reported generally weaker  
114 responses to stimuli in the amblyopic eye<sup>14,15</sup>. However, the two techniques have not previously  
115 been directly compared using common stimuli.

116  
117 Here we use both methods to measure contrast-response functions (Figure 1a) for factorial  
118 combinations of contrast shown to the left and right eyes (Figure 2g; see also<sup>11</sup>). We plot the  
119 results as a series of functions, where stimuli of increasing contrast are shown to one eye (the  
120 'target' stimuli) in the presence of a fixed-contrast (but otherwise identical) stimulus in the other  
121 eye (the 'mask' stimulus). The general character of these functions can be predicted by  
122 contemporary models of binocular signal combination<sup>16,17</sup>, and correspond well to previous  
123 measurements in intact binocular visual systems using both fMRI<sup>17</sup> and EEG<sup>18</sup>. When the mask  
124 is absent (0% contrast), the model produces a monotonically increasing monocular contrast  
125 response function (left-most curve in Figure 1a). As mask contrast increases, the overall response  
126 becomes larger because it combines the target and mask signals together. However, interocular  
127 suppression causes a surprising reduction in the response to a high contrast mask when a target  
128 of intermediate contrast is added<sup>11,19</sup>. This produces the u-shaped function shown in the final  
129 curve of Figure 1a - the response increase caused by excitation is outweighed by the response  
130 reduction caused by suppression. Responses therefore go down before they go up, giving a direct  
131 measure of interocular suppression.  
132

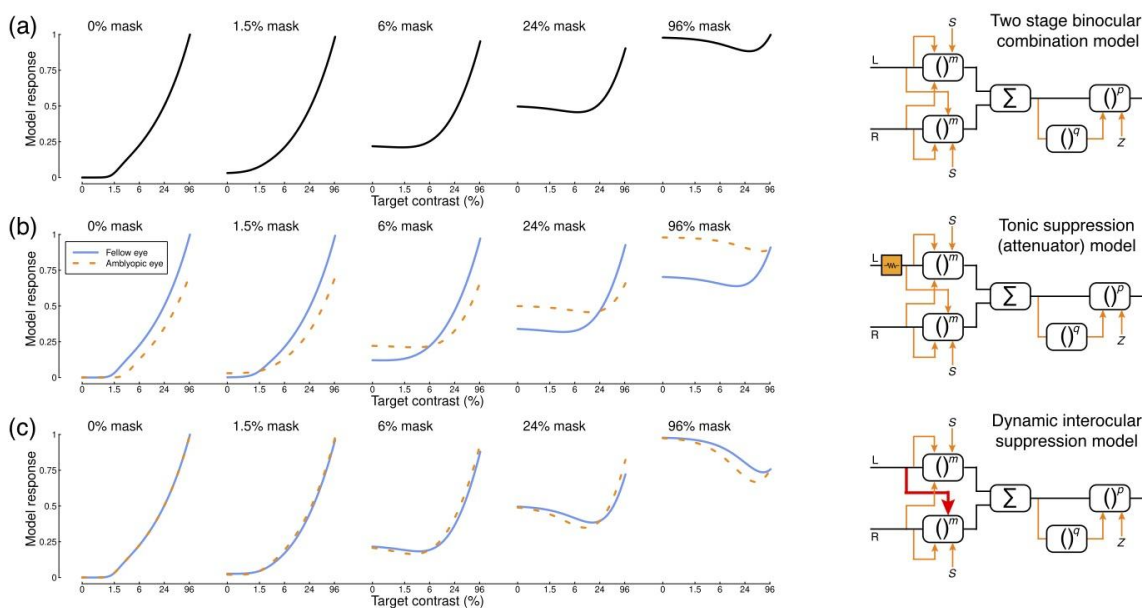

133  
134 Figure 1: Model predictions and diagrams. Panel (a) shows predictions of the two-stage model (Meese et  
135 al., 2006) for different combinations of mask and target contrasts shown to the left and right eyes. The  
136 model diagram features multiple stages of gain control (boxes), exponentiation (to powers  $m$ ,  $p$  and  $q$ ),  
137 inhibition (orange arrows), and binocular summation (denoted by  $\Sigma$ ). Panel (b) shows a variant of the same  
138 model<sup>10</sup>, where the input to the left eye is attenuated prior to any other processing (orange box in the  
139 diagram). This affects the model's behaviour by reducing the response to the affected (e.g. amblyopic) eye  
140 (orange dashed curves). Panel (c) shows a further variant in which there is stronger inhibition from one eye  
141 onto the other (red arrow in the diagram). This has no effect for monocular stimulation (leftmost function),  
142 but increases suppression with high mask contrasts (rightmost functions). Further model details and  
143 equations are given in Appendix 1.

144

145 We can disrupt the model shown in Figure 1a in two key ways. First, we can implement tonic  
146 suppression by attenuating the signal in one eye by a constant factor<sup>10</sup>. This reduces the response  
147 in the affected eye, and also weakens its impact on the fellow eye (Figure 1b). Second, we can  
148 implement dynamic suppression by increasing the weight of suppression from one eye onto the  
149 other (Figure 1c). This has no effect on monocular presentations (as there is no signal in the  
150 opposite eye to cause suppression), but with high-contrast masks there is a much greater  
151 reduction in response for intermediate signal contrasts (the u-shaped functions in the right-most  
152 plot become deeper). This experimental paradigm therefore has the potential to distinguish  
153 between these two types of suppression.

154

155 Our aim in this study was to empirically test specific predictions of these competing models by  
156 measuring neural responses with fMRI and EEG to a common set of visual stimuli. In addition to  
157 testing control participants with typical binocular vision, we also recruited individuals with a history  
158 of binocular disturbance. Although these participants do not all currently meet the diagnostic  
159 criteria for amblyopia (owing to successful treatment), they would very likely have done so in  
160 childhood and/or had they not been treated. Given the widespread incidence of treatment in  
161 countries with developed healthcare systems, understanding the residual binocular deficits in  
162 treated amblyopes is of substantial clinical importance. To summarise our results, we find  
163 attenuated responses to stimuli in the amblyopic eye when measured using EEG, and increased  
164 and asymmetrical interocular suppression in individuals with impaired binocular vision when  
165 measured using fMRI. Surprisingly this takes the form of stronger suppression of the dominant  
166 eye by the weaker eye.

167

## 168 **Methods**

169

### 170 *Participants*

171

172 A total of 44 adult participants completed the EEG experiment, 19 of whom were control  
173 participants with no history of binocular visual abnormalities, and clinically normal vision. The  
174 remaining 25 participants had been diagnosed with amblyopia, or treated for strabismus during  
175 childhood (see Table 1 for further details). Their ages ranged from 17 to 49, with a mean age of  
176 23.8 years (SD of 7.7 years). Approximately half of these participants (12/25, highlighted in bold)  
177 still met the diagnostic criteria for amblyopia at the time of testing, based on a corrected visual  
178 acuity difference of two lines or more between the eyes. The MRI experiments were completed  
179 by 10 of the control participants, and 12 of the patients (A1 - A12 in Table 1). Participants gave  
180 written informed consent, and received financial compensation for their time (£20 per experiment).  
181 The study protocols were approved by the research governance committee of the York  
182 Neuroimaging Centre, and were consistent with the original wording of the Declaration of Helsinki.

183

### 184 *Apparatus and stimuli*

185

186 In the MRI scanner, stimuli were displayed using a ProPixx DLP projector (VPixx Ltd., Quebec,  
187 Canada) with a refresh rate of 120Hz, and a resolution of 1920 × 1080 pixels. Viewed from a  
188 distance of 57cm, there were 36 pixels per degree of visual angle. The projector was driven by a

189 high performance PC. A circular polariser interleaved images intended for the left and right eyes  
 190 (effective refresh rate of 60Hz per eye). Images were projected onto a custom acrylic display  
 191 panel that maintained the polarisation, and viewed through a front-silvered mirror and passive  
 192 stereo polarizer glasses. The maximum luminance was 356cd/m<sup>2</sup> when viewed through the  
 193 glasses. In the EEG lab, stimuli were displayed using a gamma-corrected ViewPixx 3D LCD  
 194 display (VPixx Ltd.) with a refresh rate of 120Hz, and a resolution of 1920 × 1080 pixels. Viewed  
 195 from a distance of 57cm, there were 36 pixels per degree of visual angle. The display was driven  
 196 by a Mac Pro computer. Active stereo shutter goggles (NVidia 3D Vision), synchronised by an  
 197 infrared signal, allowed segregation of images to the left and right eyes. Through the goggles, the  
 198 maximum luminance was 26cd/m<sup>2</sup>. Both display systems had low levels of crosstalk, as measured  
 199 using a photometer<sup>20</sup>. All experiments were programmed in Matlab, using the Psychophysics  
 200 Toolbox extensions<sup>21-23</sup>.

201  
 202 Table 1: summary of patient demographics, clinical history and acuity measurements. Those highlighted in  
 203 bold currently meet the clinical criteria for amblyopia (acuity difference of two lines or more on a Snellen  
 204 chart). None of the participants had a residual strabismus.

| Participant | Sex | Amblyopic Eye | R acuity | L acuity | Stereo acuity | Detected | Patching  | Surgery | Correction           |
|-------------|-----|---------------|----------|----------|---------------|----------|-----------|---------|----------------------|
| A1          | F   | Right         | 20/32    | 20/25    | None          | 18 mo    | 1 - 6 y   | <18mo   | None                 |
| <b>A2</b>   | M   | Right         | 20/50    | 20/20    | 80s           | 9 y      | 9 y       | None    | None                 |
| <b>A3</b>   | M   | Left          | 20/20    | 20/50    | 140s          | 4 y      | 4 y       | None    | None                 |
| A4          | M   | Left          | 20/20    | 20/32    | 140s          | 18 mo    | 5 y       | 18 mo   | None                 |
| <b>A5</b>   | F   | Left          | 20/20    | 20/40    | 40s           | 5 y      | 5 - 6 y   | None    | LE: -2.5; RE: + 0.75 |
| <b>A6</b>   | M   | Left          | 20/20    | 20/40    | 80s           | 4 y      | 4 y       | None    | None                 |
| <b>A7</b>   | F   | Right         | 20/40    | 20/20    | 60s           | ~10 y    | None      | None    | None                 |
| <b>A8</b>   | F   | Left          | 20/40    | 20/80    | None          | 11 y     | 11 - 12 y | None    | None                 |
| A9          | F   | Left          | 20/16    | 20/16    | 400s          | 6 y      | None      | None    | None                 |
| A10         | F   | Left          | 20/16    | 20/20    | None          | 18 mo    | 4 y       | None    | LE: +4; RE:+3.75     |
| A11         | M   | Right         | 20/20    | 20/20    | 140s          | 5 y      | 5 y       | None    | None                 |
| A12         | F   | Right         | 20/20    | 20/20    | 400s          | 3 y      | None      | 3 & 4 y | None                 |
| <b>A13</b>  | F   | Left          | 20/20    | 20/50    | None          | 5 y      | 5 - 6 y   | None    | None                 |
| A14         | F   | Left          | 20/25    | 20/32    | 40s           | 4 y      | 4 - 6 y   | None    | None                 |
| <b>A15</b>  | M   | Left          | 20/16    | 20/32    | None          | 20 mo    | 4 y       | 1 & 7 y | Not known            |
| <b>A16</b>  | M   | Right         | 20/120   | 20/25    | 400s          | 9 y      | None      | None    | None                 |
| <b>A17</b>  | M   | Right         | 20/100   | 20/16    | None          | 4 y      | 4 y       | None    | None                 |
| A18         | F   | Left          | 20/16    | 20/16    | None          | 7 y      | 7 - 10 y  | None    | None                 |
| <b>A19</b>  | F   | Left          | 20/20    | 20/200   | None          | 18 mo    | 18 mo     | None    | None                 |
| A20         | M   | Left          | 20/50    | 20/50    | 200s          | <6 y     | 6 y       | None    | None                 |
| A21         | F   | Right         | 20/20    | 20/16    | 40s           | 5 y      | 5 y       | None    | LE: -1.25; RE: -1.75 |
| A22         | F   | Left          | 20/20    | 20/32    | None          | ~6 y     | 6 - 7 y   | ~6 y    | LE: +10.5; RE: +9.5  |
| A23         | M   | Right         | 20/32    | 20/20    | 400s          | 5 y      | 5 y       | 16 y    | None                 |
| <b>A24</b>  | F   | Left          | 20/20    | 20/40    | 40s           | 4 y      | 4 - 5 y   | None    | None                 |
| A25         | M   | Left          | 20/16    | 20/20    | 140s          | 2 y      | 2 - 3 y   | None    | None                 |

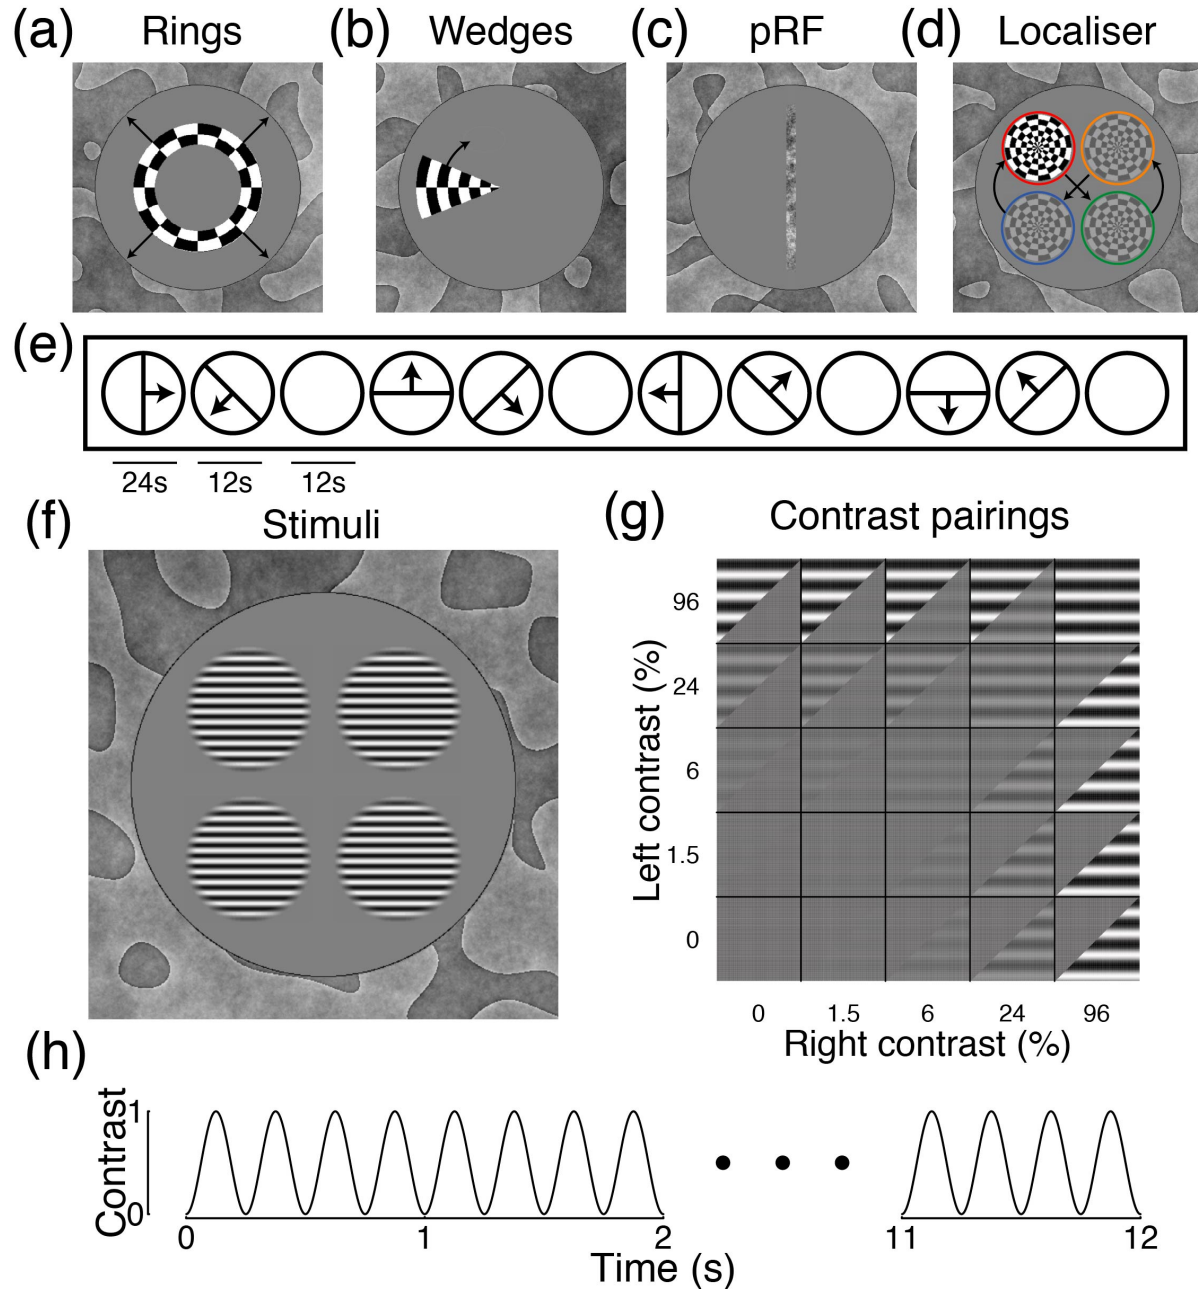

206  
207  
208  
209  
210  
211  
212  
213  
214  
215  
216

Figure 2: Example stimuli and methodological details. Panels (a,b,c,d,f) show stimuli used in different parts of the study. Panels (a,b) show ring and wedge plaid stimuli used in retinotopic mapping, with black arrows (not presented) indicating the direction of motion. Panel (c) shows the noise bar used in population receptive field (pRF) mapping, which followed the temporal sequence illustrated in panel (e). Panel (d) shows the plaid localiser stimulus, which followed the positional sequence indicated by the arrows (only one plaid was visible in a given 6-second window, and the coloured rings were not shown). Panel (f) shows the sine-wave grating stimuli used to measure contrast response functions. These were presented to the left and right eyes in different contrast combinations, as illustrated in panel (g). The gratings flickered on and off for 12 seconds according to a 4Hz sine-wave, as shown in panel (h).

217 Retinotopic mapping involved binocularly presented ring and wedge stimuli constructed from a  
218 radial square wave plaid, as illustrated in Figure 2a,b. The plaid had an angular wavelength of 45  
219 degrees (i.e. 8 complete cycles in 360 degrees), a radial frequency of 0.8 cycles per degree, and  
220 flickered in counterphase at 4Hz. Expanding rings had a width of 1 plaid cycle, and a period of 12  
221 seconds per sequence (4 ring positions). Rotating wedges were 45 degrees (1 cycle) wide, with  
222 a period of 24 seconds per rotation (8 positions in 45 degree clockwise steps). Population  
223 receptive field (pRF) mapping used a drifting bar ( $0.5 \times 10$  degrees) of dynamic  $1/f$  noise, with an  
224 RMS contrast of 0.2 (see Figure 2c). The bar drifted at a speed of 0.4 deg/sec, and followed the  
225 sequence illustrated in Figure 2e. The pRF stimulus was presented to either the left or right eye  
226 in different blocks, with the other eye viewing mean luminance. We used a phase-encoded  
227 localiser stimulus, constructed from a radial plaid with a width of 4 degrees (see Figure 2d),  
228 presented binocularly. The localiser stimulus counterphase flickered at 4Hz, and changed position  
229 every 6 seconds, according to the sequence illustrated in Figure 2d. Each stimulus location had  
230 an x-y offset of  $\pm 2.34$  degrees from fixation. Stimuli for the main experiments were four horizontal  
231 sine-wave gratings with a spatial frequency of 3c/deg, a cosine-blurred spatial window, and a  
232 width of 4 degrees (see Figure 2f). Five different Michelson contrast values (defined as  $100 \cdot (L_{\max} - L_{\min}) / (L_{\max} + L_{\min})$ , where  $L$  is luminance) were presented in different combinations (see Figure 2g).  
233 The stimuli flickered sinusoidally between 0 and their nominal contrast (on/off flicker) at a  
234 frequency of 4Hz (see Figure 2h). The grating stimuli had x-y offsets of  $\pm 2.34$  degrees from  
235 fixation. In all experiments, a static binocular texture was presented to aid fusion. This was  
236 constructed from low spatial frequency bandpass filtered noise, and filled the display beyond the  
237 central 12 degree stimulus aperture (see Figure 2 for examples).  
238  
239

#### 240 *MRI acquisition*

241  
242 All MRI data were acquired using a GE 3T HDx Excite MRI scanner. We collected two high  
243 resolution T1-weighted structural scans (TR 7.8 ms; TE 3 ms; voxel size  $1 \times 1 \times 1$  mm;  $12^\circ$  flip  
244 angle; matrix size  $256 \times 256$ ; FOV 256 mm), and two T2\*-weighted fast gradient recalled echo  
245 scans (TR 400 ms; TE 4.2 ms; voxel size  $1 \times 1 \times 2$  mm;  $25^\circ$  flip angle; matrix size  $128 \times 128$ ;  
246 FOV  $260 \times 260$  mm), using an 8-channel surface coil (Nova Medical, Wilmington, MA, USA). We  
247 acquired functional images using an EPI sequence with a 16-channel posterior surface coil (Nova  
248 Medical, Wilmington, MA, USA), to optimize signal-to-noise ratio at the occipital pole. The slice  
249 prescription covered the region containing the calcarine sulcus and occipital pole with 39 axial  
250 slices (TR 3000 ms; TE 30 ms; voxel size  $2 \times 2 \times 2$  mm;  $90^\circ$  flip angle; matrix size  $96 \times 96$ ; FOV  
251  $192 \times 192$  mm). We also acquired an in-plane proton density scan using the same slice  
252 prescription to aid alignment with the structural scans.  
253

254 Participants completed the MRI experiments in two sessions. In the first session, we collected the  
255 structural scans, and the retinotopic mapping and pRF data. Each pRF sequence lasted 396  
256 seconds (132 TRs), and either the left or right eye was stimulated. Two repetitions for each eye  
257 were completed. The retinotopic mapping (ring and wedge) sequences were collected as a single  
258 scan lasting 204 seconds (68 TRs). In the second session, the phase-encoded localiser and  
259 contrast response function data were collected. The localiser scan lasted 156 seconds (52 TRs),



260 and consisted of a blank period (12 seconds), followed by 6 repetitions of the localiser sequence.  
261 The contrast response function sequence lasted 612 seconds (204 TRs), and tested each of the  
262 25 conditions (see Figure 2g) once, with 12-second blank periods between each 12-second trial.  
263 This was repeated four times for each participant. During all functional scans, participants  
264 performed a fixation task, in which they monitored a grid of 9 squares (3x3, each 0.14 degrees  
265 wide) with random luminances in the centre of the screen. They were instructed to press a button  
266 whenever the fixation marker was changed by re-randomising the luminances. This occurred at  
267 randomly determined times, on average once every 48 seconds (i.e. once every two trials). The  
268 task was intended to maintain attention and fixation, and we did not record the responses.

269

### 270 *MRI analysis*

271

272 Primary MRI analysis was conducted in Matlab using the mrVista toolbox  
273 (<https://github.com/vistalab/vistasoft>). Functional data were motion-corrected within and between  
274 scans, and aligned to the in-plane (proton density) scan, and subsequently to the participant's  
275 anatomical space. The first 12 seconds (4 TRs) of each functional scan were discarded to account  
276 for magnetic saturation effects. Structural scans were processed using Freesurfer<sup>24,25</sup> to generate  
277 a 3D model of the cortex. We created flat patches of unfolded cortex for each hemisphere (120  
278 mm in diameter), centred on the occipital pole (see Figure 3) to facilitate data visualisation and  
279 the creation of Regions of Interest (ROIs). The ring and wedge retinotopy and localiser scans  
280 were summarised by a coherence (travelling wave) analysis<sup>26</sup> to calculate the phase of the BOLD  
281 response at the repetition frequency of the stimulus for each voxel. The pRF data were fit by  
282 estimating (at each voxel) the parameters of a 2D Gaussian function that best predicted the BOLD  
283 timecourse, given the position of the bar stimulus<sup>27</sup>. This was done independently for the left and  
284 right eye scans. The contrast response function data were combined across repetition and  
285 analysed using a general linear model (GLM), with regressors ( $\beta$  weights) for each of the 25  
286 conditions. We used a combination of retinotopy and pRF results to define a V1 ROI on the  
287 flattened cortex using the location of the calcarine sulcus and reversals of phase angle. ROIs  
288 were further restricted using the localiser data, by retaining voxels with a coherence exceeding  
289 0.3. Results were saved as Matlab files, and imported into *R* for statistical analysis and  
290 visualisation. We also converted GLM  $\beta$  weights to MNI space (using tools from FSL<sup>28</sup>), and  
291 averaged them across participants for visualisation on an inflated cortex in the Connectome  
292 Workbench software<sup>29</sup>.

293

### 294 *EEG acquisition*

295

296 All EEG data were acquired using a 64-channel ANT Neuroscan system, with electrodes  
297 positioned in a Waveguard cap according to the 10-20 system. Signals were recorded at 1000Hz,  
298 and referenced to the whole-head average. Low-latency digital triggers were sent from the  
299 stimulus computer to the EEG amplifier using a parallel cable, and recorded stimulus onset and  
300 condition codes to the EEG trace. Participants completed 8 repetitions of the contrast response  
301 function experiment. On each repetition, stimuli were presented for trials of 12 seconds, with an  
302 intertrial interval of 3 seconds. All 25 conditions (see Figure 2g) were presented once per  
303 repetition in a random order, taking 375 seconds per block. Participants were given breaks

304 between blocks. The same fixation task as described for the MRI experiments was performed  
305 throughout the experiment to maintain attention.

306

### 307 *EEG analysis*

308

309 Raw data were converted to a compressed *csv* format using functions from EEGlab<sup>30</sup>, and were  
310 then imported into *R* for analysis. We took the Fourier transform of the EEG waveform at each  
311 electrode, for a ten-second window beginning one second after stimulus onset (to avoid onset  
312 transients). Fourier spectra were averaged across four occipital electrodes (*Oz*, *POz*, *O1* and *O2*),  
313 and across repetition, using coherent averaging (i.e. retaining the phase information). We then  
314 calculated signal-to-noise ratios (SNRs) by dividing the absolute amplitude in the signal bin (4Hz)  
315 by the mean of the ten adjacent bins ( $\pm 0.5$ Hz in steps of 0.1Hz). These SNRs were averaged  
316 across participants, and standard errors were calculated using bootstrapping. To plot the  
317 timecourse of SSVEP activity, we repeated the Fourier transform using a sliding one-second  
318 window (in steps of 10ms), and scaled by the two adjacent bins ( $\pm 1$  Hz) to calculate the SNR.

319

### 320 *Data and script availability*

321

322 Data, experiment code (in Matlab) and analysis code (in Matlab and R) is available at:  
323 <http://dx.doi.org/10.17605/OSF.IO/X9ZR8>

324

## 325 **Results**

326

327 We used the results from retinotopic mapping scans with ring and wedge stimuli (Figure 2a,b),  
328 and population receptive field (pRF) sequences (Figure 2c,e), to identify primary visual cortex  
329 (V1) on flattened discs of occipital cortex for each hemisphere. Example flat maps are shown in  
330 Figure 3 for one control participant (see the project repository for equivalent plots for all  
331 participants: <https://osf.io/x9zr8/>). The phase angle of the BOLD response to the ring stimuli, and  
332 the pRF eccentricity values, showed a typical central-to-peripheral gradient<sup>27</sup>, and were highly  
333 consistent (e.g. across left and right eye pRF sequences). The phase angle across the wedge  
334 and pRF scans showed strong hemisphere/hemi-field segregation (i.e. the right hemisphere  
335 responded to stimuli in the left hemi-field and vice versa), as well as the expected phase  
336 reversals<sup>31</sup> that were used to determine boundaries between V1, V2 and V3 (shown by the white  
337 triangles in each map - the middle triangle is V1). The V1 region-of-interest (ROI) was further  
338 restricted using the responses to a phase-encoded localiser stimulus (see Figure 2d). These  
339 responses also showed strong hemisphere/hemi-field and dorsal/ventral segregation, and we  
340 retained voxels in the V1 ROI that produced responses with a coherence of 0.3 or higher (right-  
341 most flat maps in Figure 3). This resulted in a mean total V1 ROI size (combined across  
342 hemispheres) of 601 voxels, and no significant difference in ROI size between patients and  
343 controls ( $t(20)=0.54$ ,  $p=0.60$ ).

344

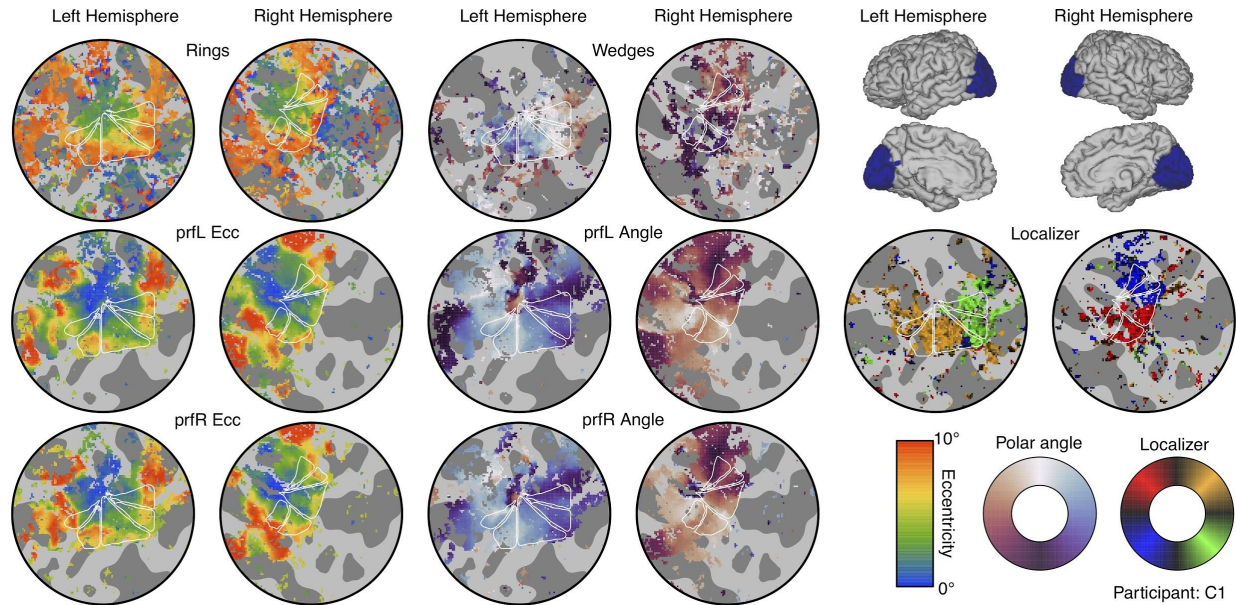

345  
346 Figure 3: Summary of retinotopic mapping and functional localizer results. The icons in the upper right  
347 corner indicate the region of cortex in each hemisphere used to make the flat maps (each 120 mm in  
348 diameter). The left-most columns show eccentricity estimates from a plaid ring localiser (top row), and pRF  
349 models for stimuli shown to the left (middle row) and right (lower row) eyes. The middle columns show the  
350 polar angle parameter from a rotating plaid wedge localiser (top row) and the two pRF models (middle and  
351 lower rows). The flat maps in the right-most columns show the responses to the phase-encoded plaid  
352 localiser. Colour maps for each measure are shown in the lower right corner. In each flat map, dark grey  
353 regions indicate sulci, and white triangles show the locations of visual areas V1 (middle triangle) and  
354 V2/3v/d (outer triangles). The phase encoded retinotopy and localiser results were thresholded at a  
355 coherence value of 0.3, and the pRF results were thresholded at 10% of explained variance.

356  
357 The localiser-restricted V1 ROIs for each participant were then used to estimate neural responses  
358 to stimuli of different contrasts presented to the two eyes (Figure 2f). The BOLD response in this  
359 ROI had a typical timecourse<sup>32</sup>, which was modulated by stimulus contrast (see Figure 4a). We  
360 fitted a general linear model (GLM) to the full timecourse to estimate a  $\beta$  coefficient for each  
361 stimulus condition at each voxel. The  $\beta$  weights were strongly modulated by stimulus contrast at  
362 the occipital pole (red shading in Figure 4b). In a separate experiment using identical stimuli, we  
363 also recorded steady-state visual evoked potentials (SSVEPs) using EEG. These showed clear  
364 modulation of signal-to-noise ratio (SNR) with stimulus contrast at the flicker frequency of the  
365 stimuli (4Hz, Figure 2g), but with a less sluggish timecourse than the BOLD response (see Figure  
366 4c). The responses were well-isolated in the Fourier amplitude spectrum (see Figure 4d), and  
367 localised to occipital electrodes (Figure 4d inset). We therefore used the fMRI  $\beta$  weights averaged  
368 across the ROI, and the SSVEP SNRs averaged across four occipital electrodes (black points in  
369 the Figure 4d inset) to calculate contrast response functions for each experiment. Exploratory  
370 analyses in V2 and V3, and using different localiser thresholds to define the V1 ROI, produced  
371 very similar functions (not shown), as did using raw amplitude values for the EEG experiment  
372 (rather than SNR values).

373

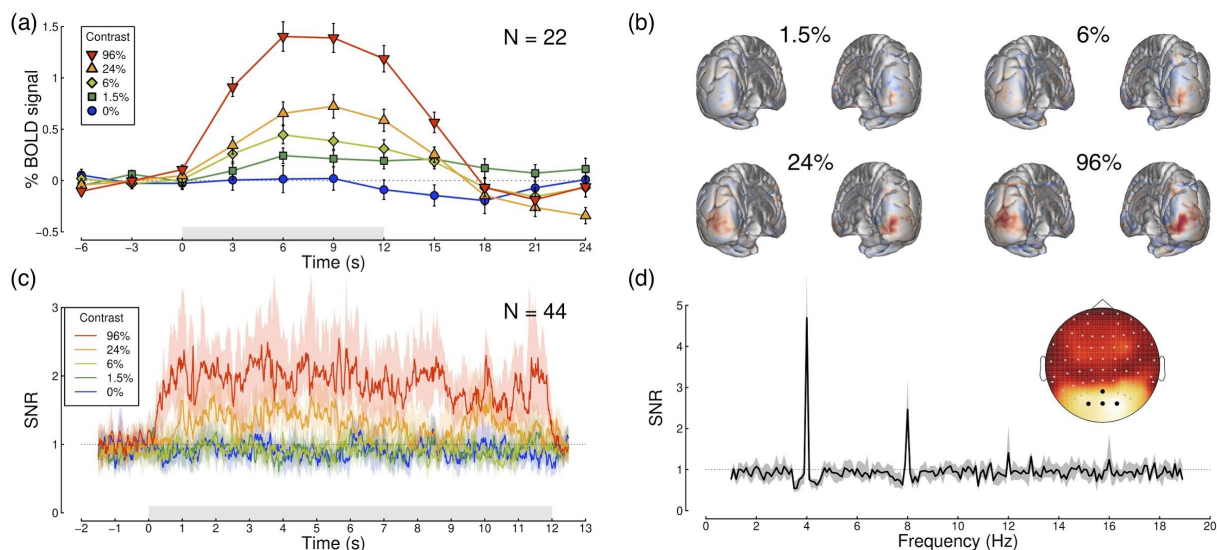

374  
375 Figure 4: Timecourses and topographies of visual responses measured using fMRI and EEG. Panel (a)  
376 shows the BOLD timecourse in the localiser-restricted V1 ROI, for binocular presentation at five stimulus  
377 contrasts (see legend). The grey rectangle adjacent to the x-axis indicates the period when the stimulus  
378 was presented, and error bars indicate  $\pm 1$ SE across participants (N=22). Panel (b) shows averaged beta  
379 weights (unthresholded) from the general linear model, projected on a posterior view of each hemisphere,  
380 for the non-zero stimulus contrasts averaged across all participants (subtracting the 0% condition as a  
381 baseline). Panel (c) shows the SSVEP timecourse as a signal-to-noise ratio (SNR) at the target flicker  
382 frequency (4Hz), calculated using a 1000ms sliding window (centred at the time indicated on the x-axis).  
383 Shaded regions indicate bootstrapped 95% confidence intervals of the median, calculated across  
384 participants (N=44). The grey shaded rectangle represents the period when the stimulus was presented.  
385 Panel (d) shows the Fourier spectrum for a 96% contrast binocular target, averaged across all participants  
386 (N=44), for 10-second windows of stimulation. Clear peaks in SNR are apparent at the stimulus flicker  
387 frequency (4Hz) and its harmonics (especially 8Hz). The grey shaded region indicates 95% confidence  
388 intervals of the median. The inset scalp topography shows that responses were strongest at posterior  
389 electrode sites over early visual areas. For panels (c,d), signals were averaged across the electrodes  
390 indicated in black on the scalp plot (Oz, POz, O1 and O2).

391  
392 Figure 5 shows contrast response functions from both experiments, split by participant group  
393 (control participants in Figure 5a,c, patients in Figure 5b,d). The first contrast response function  
394 in each row (circle symbols) is for monocular stimulus presentation, and shows the expected  
395 monotonic increase for each data set. As predicted by our computational models (see Figure 1),  
396 as mask contrast increased, the functions rose from baseline across the plot. Statistically, there  
397 were significant main effects of both target and mask contrast, and significant interactions, for all  
398 data sets (see Table 2). For the patients there was a very slight reduction of response in the  
399 amblyopic eye (orange circles) compared with the fellow eye (blue circles) at the highest target  
400 contrast in the fMRI data (Figure 5b), though this was not significant ( $t(11)=1.20$ ,  $p=0.26$ ,  $d=0.35$ ).  
401 The difference was more pronounced in the SSVEP data (Figure 5d), and was significant at 24%  
402 target contrast ( $t(24)=2.91$ ,  $p<0.01$ ,  $d=0.58$ ), though not at 96% contrast ( $t(24)=1.96$ ,  $p=0.06$ ,  
403  $d=0.39$ ).

404

405 For the control participants, there was evidence of interocular suppression (a u-shaped function)  
 406 for the highest mask contrast when measured using fMRI (final function in Figure 5a), though this  
 407 was not statistically significant (paired samples t-test comparing 0% and 6% target contrast  
 408 conditions when a 96% contrast mask was present,  $t(9)=1.8$   $p=0.10$ ,  $d=0.57$ , mean difference of  
 409 0.13  $\beta$  units). For the control EEG data interocular suppression occurred at a higher target  
 410 contrast (96%, see final function in Figure 5c), but was also not significant ( $t(18)=0.96$ ,  $p=0.35$ ,  
 411  $d=0.22$ , mean difference of 0.44 SNR units). The u-shaped function was more pronounced in the  
 412 patients (Figure 5b,d). For the fMRI data, suppression was more substantial when the mask was  
 413 shown to the fellow eye (orange inverted triangles comparing 0% and 6% target levels with a 96%  
 414 mask;  $t(11)=3.25$ ,  $p=0.008$ ,  $d=0.94$ , mean difference of 0.46  $\beta$  units) than the amblyopic eye (blue  
 415 inverted triangles;  $t(11)=2.51$ ,  $p=0.029$ ,  $d=0.72$ , mean difference of 0.22  $\beta$  units). A very subtle  
 416 suppression effect was qualitatively apparent for the SSVEP data (Figure 5d), but this did not  
 417 reach statistical significance for either eye (both  $p>0.05$ ). SSVEP responses at the second  
 418 harmonic frequency (8Hz) were broadly similar to those at the fundamental (see Supplementary  
 419 Figure S1).

420

421 Table 2: ANOVA results for contrast response functions.

| Data set      | Effect                 | F-ratio (df)  | p-value | Effect size ( $\omega^2$ ) |
|---------------|------------------------|---------------|---------|----------------------------|
| Control fMRI  | Left eye contrast      | 18.82 (4,36)  | <0.001  | 0.27                       |
| Control fMRI  | Right eye contrast     | 19.56 (4,36)  | <0.001  | 0.22                       |
| Control fMRI  | Interaction            | 2.91 (16,144) | <0.001  | 0.18                       |
| Patient fMRI  | Fellow eye contrast    | 12.80 (4,44)  | <0.001  | 0.14                       |
| Patient fMRI  | Amblyopic eye contrast | 8.47 (4,44)   | <0.001  | 0.14                       |
| Patient fMRI  | Interaction            | 2.92 (16,176) | <0.001  | 0.15                       |
| Control SSVEP | Left eye contrast      | 29.93 (4,72)  | <0.001  | 0.31                       |
| Control SSVEP | Right eye contrast     | 27.21 (4,72)  | <0.001  | 0.28                       |
| Control SSVEP | Interaction            | 6.43 (16,288) | <0.001  | 0.14                       |
| Patient SSVEP | Fellow eye contrast    | 34.88 (4,96)  | <0.001  | 0.38                       |
| Patient SSVEP | Amblyopic eye contrast | 19.26 (4,96)  | <0.001  | 0.17                       |
| Patient SSVEP | Interaction            | 2.96 (16,384) | <0.001  | 0.04                       |

422

423

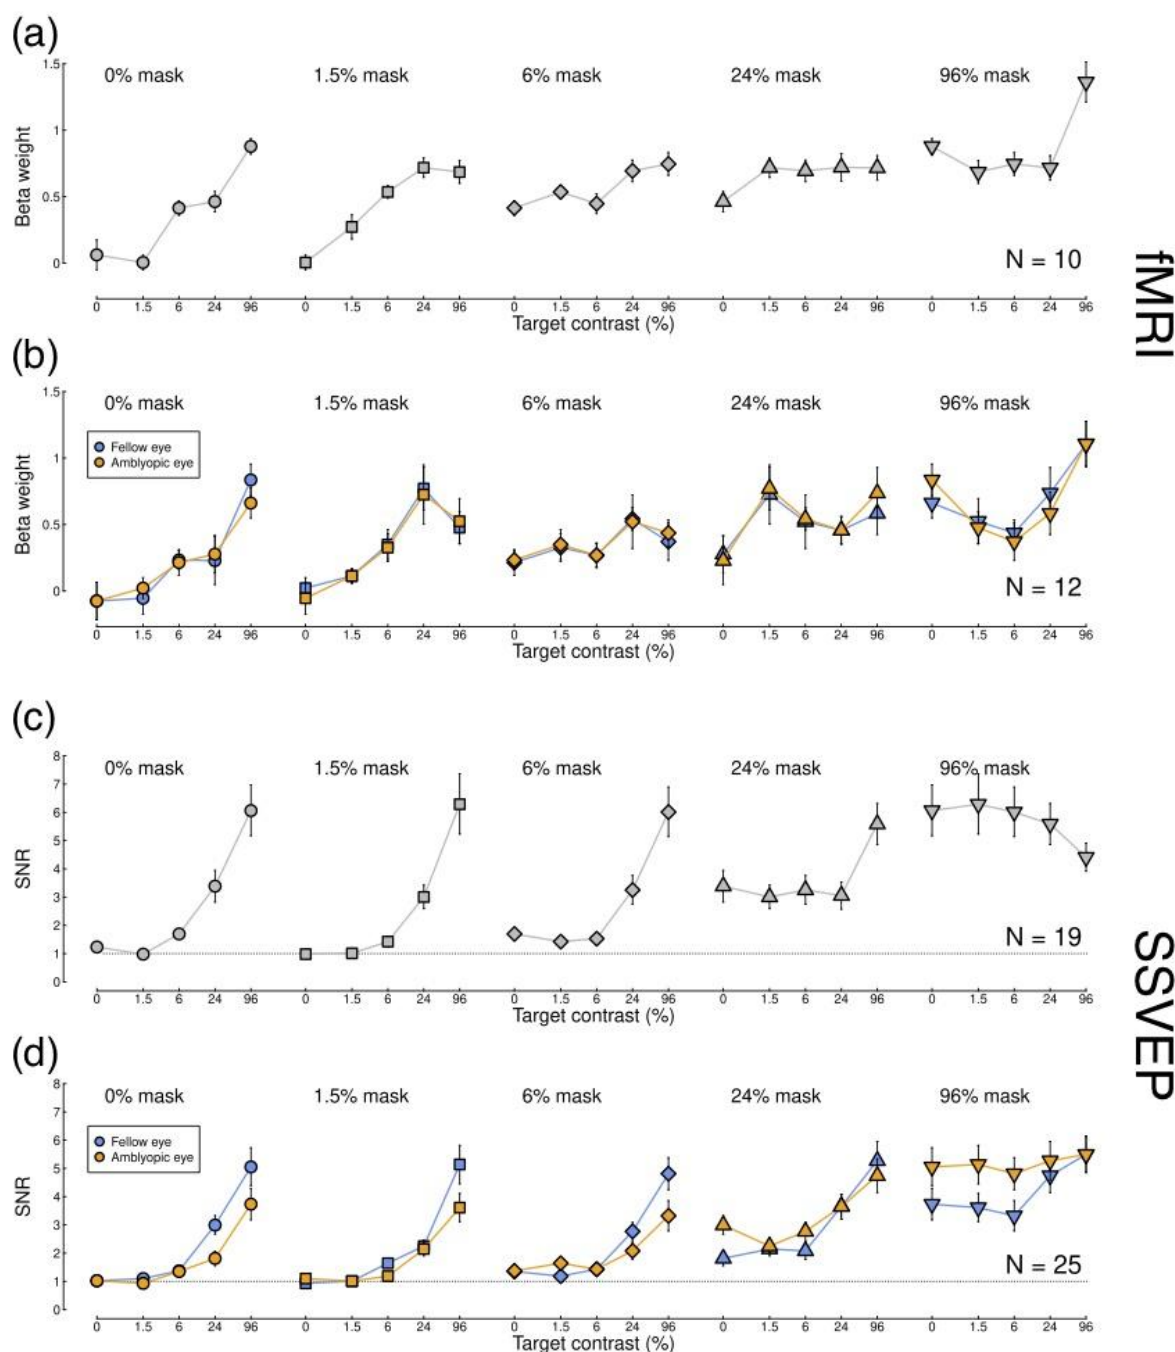

424  
425 Figure 5: Contrast response functions measured using fMRI and EEG. Data for control participants (panels  
426 a,c) are averaged across complementary conditions for the left and right eyes. Data for patients (panels  
427 b,d) are plotted considering the fellow eye as the 'target' eye (blue) and also considering the amblyopic eye  
428 as the 'target' eye (orange). These data are identical, but are re-ordered to aid interpretation. Error bars in  
429 each plot indicate  $\pm 1$ SE across participants.  
430

431 To further investigate the interocular suppression effect, we plotted full BOLD timecourses for the  
432 condition where the mask only was shown (96% contrast mask to one eye, 0% contrast target to  
433 the other), and the condition where the same mask was paired with a 6% contrast target in the  
434 other eye (see Figure 6). Interocular suppression is clear in each data set, as the white points  
435 appear below the black points over much of the function. Our computational model (see right-  
436 most functions in Figure 1a,c) predicts that this happens because the excitatory impact of the 6%  
437 contrast stimulus is outweighed by its suppression of the response to the 96% contrast stimulus  
438 in the other eye: overall activity goes down instead of up. However this effect is much more  
439 substantial for the fellow eye of the patients (Figure 6b) than for the amblyopic eye (Figure 6c),  
440 consistent with our finding from the  $\beta$  weights (Figure 5b). The cortical meshes along the upper  
441 row of Figure 6 show the difference in  $\beta$  weights between conditions, with blue shading indicating  
442 stronger suppression. Suppression is apparent at the occipital pole, and is again strongest for the  
443 fellow eye of the patients (Figure 6b).  
444

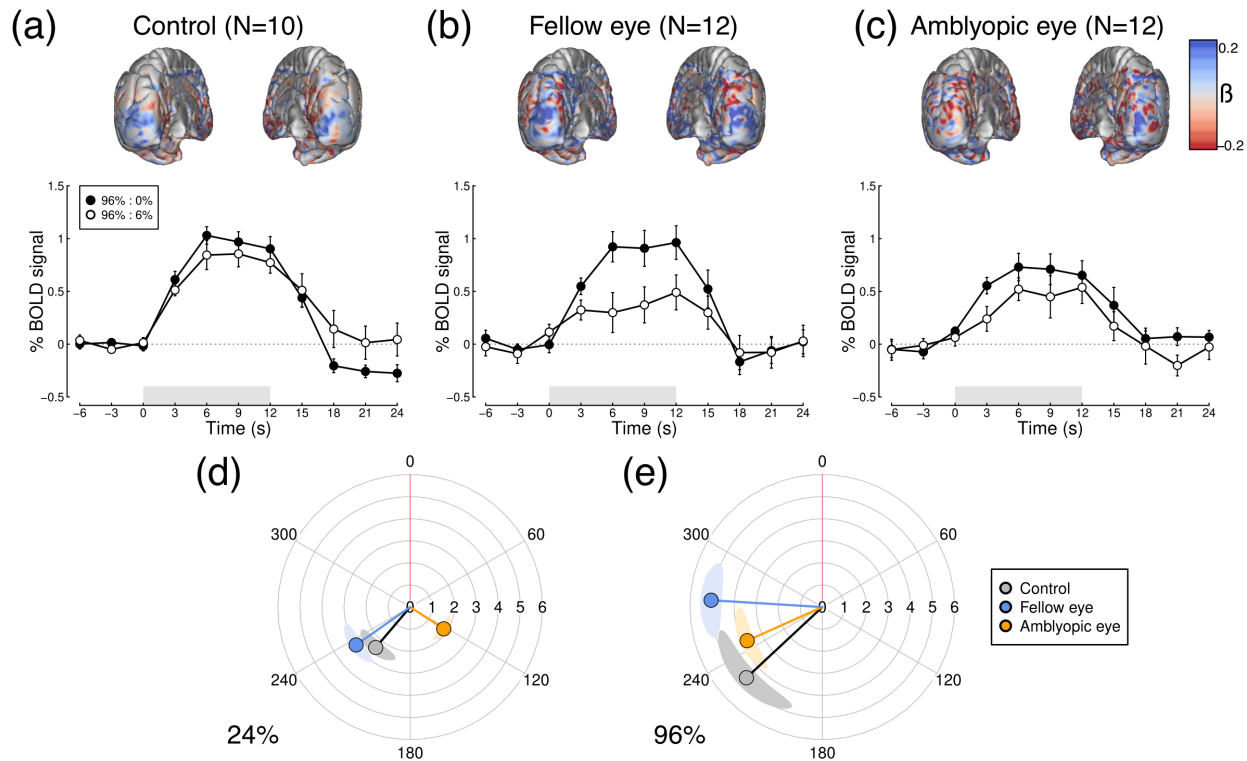

445  
446 Figure 6: Timecourse and spatial distribution of interocular suppression measured using fMRI, and polar  
447 plots of SSVEP responses to monocular stimuli. Upper plots show the difference of  $\beta$  weights at each voxel  
448 (unthresholded), between a monocular condition where one eye saw 96% contrast, and a dichoptic  
449 condition where the eyes saw 96% and 6% contrast. Blue shading indicates a suppressive effect (and red  
450 shading a facilitatory effect) of the 6% component. Lower panels show the timecourse of % signal change  
451 for the same two conditions. Data are shown for (a) control participants, (b) the 96% contrast mask in the  
452 fellow eye of the patients, and (c) the 96% contrast mask in the amblyopic eye of the patients. Error bars  
453 indicate  $\pm 1$ SE across participants, and grey shaded rectangles show the duration of stimulus presentation.  
454 Panels (d,e) show SSVEP responses for monocularly presented stimuli at 24% (d) and 96% (e)  
455 contrast. This representation shows a phase lag (i.e. angular difference) between the amblyopic (orange)  
456 and fellow (blue) eyes. Shaded regions indicate  $\pm 1$ SE, calculated independently for amplitude and phase values.

457 The lower two panels of Figure 6 show polar plots comparing monocular SSVEP responses to  
458 stimuli of 24% contrast (Fig 6d), and 96% contrast (Fig 6e). There is a phase lag between the  
459 fellow and amblyopic eye in both panels. For the 24% contrast target, this is approximately 112  
460 degrees, which corresponds to a lag of around 78 ms at the 4Hz flicker frequency used here. For  
461 the 96% contrast, the lag is around 28 degrees (20 ms). This latter estimate corresponds well with  
462 previously reported phase lags using a similar paradigm in magnetoencephalography (MEG)<sup>33</sup>.

## 464 Discussion

465  
466 We measured neural responses to different combinations of contrast in the left and right eyes,  
467 using both EEG and fMRI. In participants with atypical binocular vision, we found reduced  
468 responses in the amblyopic eye using EEG, and increased suppression between the eyes  
469 (compared with controls) in V1 using fMRI. These different effects are consistent with greater  
470 tonic and dynamic suppression (respectively) in individuals with impaired binocular vision, and  
471 may be responsible for the deficits in stereopsis experienced by the majority of these participants  
472 (see Table 1). We now discuss why the results differ across measurement methods, what these  
473 findings tell us about amblyopic suppression, and how treatments might be targeted towards the  
474 development of functioning binocular vision.

### 475 476 *Comparison of EEG and fMRI measures*

477  
478 This is the first study to use both EEG and fMRI to investigate contrast processing in impaired  
479 binocular vision. Previous studies using either EEG or MEG<sup>14,33</sup> have typically found larger  
480 amblyopic deficits in the monocular response than those using fMRI<sup>34,35</sup> (though some work has  
481 shown substantial fMRI deficits<sup>36</sup>), mirroring our results here (left-most functions of Figure 5b,d).  
482 Considering only this previous work, heterogeneity of stimuli and participants across studies might  
483 well have explained the differences. However in the present experiments we used identical  
484 stimuli, and the same participants completed both experiments (Supplementary Figure S2 shows  
485 the EEG data for only the participants who completed the MRI experiments). The reduction in  
486 response amplitude to stimuli in the weaker eye is clearer using SSVEP than using fMRI.  
487 However, differences in dynamic interocular suppression are only apparent when measured with  
488 fMRI (right-most functions in Figure 5a,b; Figure 6a-c).

489  
490 Analogous differences between these two methods have recently been reported in the study of  
491 attention. Itthipuripat et al.<sup>37</sup> found that spatial attention produces a change in baseline response  
492 when measured using fMRI, but not when measured using EEG (including evoked potentials and  
493 SSVEPs). Instead fMRI, which measures global neural activity indirectly via oxygen consumption,  
494 appears to be more closely related to late ERP components and alpha band oscillations recorded  
495 using EEG<sup>37</sup>, rather than the stimulus onset transients detected by SSVEP and early ERP  
496 components. Although our contrast response functions do not involve baseline shifts, the other  
497 differences between our fMRI and EEG results are consistent with different features of neural  
498 activity being probed by these two methods.

499



500 One possible explanation for the differences in monocular response between methods is that the  
501 firing of visual neurons responsive to the amblyopic eye might be desynchronised. This would  
502 have a greater effect on phase-locked SSVEP responses – which depend upon synchronised  
503 firing – than on fMRI BOLD responses, which are a proxy for overall neural activity. Instead,  
504 asynchronous activity in higher frequency bands (50 – 200Hz) shows a closer correspondence  
505 with the BOLD response<sup>38</sup>, and these signals can be detected with extracranial techniques such  
506 as MEG<sup>39</sup>. In terms of the differences in suppression, this could reflect processing in different  
507 layers of cortex. Evoked responses measured using EEG correspond most closely to activity in  
508 the more superficial (supragranular) layers of cortex, whereas much inhibitory processing involves  
509 deeper (granular) layers<sup>40</sup>. Future work using laminar fMRI at higher field strength (7T or above<sup>41</sup>),  
510 or multi-unit electrophysiology<sup>42,43</sup>, could allow dissociation of excitatory and inhibitory responses  
511 in amblyopia. In addition, these methods can resolve ocular dominance columns in V1, allowing  
512 eye-specific inputs to be measured directly.

513

514 *What is amblyopic suppression?*

515

516 Suppression in amblyopia is measured very differently in clinical practice compared with the  
517 methods used in lab-based neuroscience research. The most common clinical measures are the  
518 Worth 4-dot test, and Bagolini striated lenses, both of which give a qualitative indication of whether  
519 one eye's image is substantively suppressed by the other eye during binocular viewing. Lab-  
520 based measures involve a variety of paradigms, including psychophysical approaches such as  
521 dichoptic masking<sup>10,44–46</sup>, or assessing binocular fusion of edges<sup>47</sup> or gratings<sup>48</sup>, and more direct  
522 neurophysiological estimates of suppression in animal models<sup>49,50</sup>. However, because both eyes  
523 are being stimulated during testing, clinical suppression could in principle be explained by either  
524 tonic or dynamic suppression, and most psychophysical work also cannot distinguish between  
525 these possibilities. Many of our patients (around half) no longer met the clinical criterion for  
526 amblyopia, yet as a group they still exhibited greater dynamic interocular suppression than our  
527 control participants, as well as tonic suppression of one eye. The finding that both types of  
528 suppression are apparent, even in individuals who have received patching or surgical  
529 interventions, strongly suggests that both will also be present in untreated amblyopes. Amblyopic  
530 suppression might therefore involve a combination of these two processes.

531

532 One feature that remains to be determined is whether one type of suppression is a primary cause  
533 of amblyopia, and the other a later consequence. Cortical suppression, characterised as a  
534 process of gain control<sup>51</sup>, is a dynamic, adaptive process that acts to optimise the sensory  
535 response<sup>52</sup>. It is clear that binocular vision is particularly plastic, as the relative weighting of the  
536 two eyes can be altered following a brief period of occlusion<sup>53</sup>, and this may be the mechanism  
537 by which clinical patching treatment improves vision. Our finding of increased suppression of the  
538 fellow eye by the amblyopic eye could be an attempt to rebalance an asymmetrical system. If so,  
539 this might influence the development of novel treatments geared towards modulating interocular  
540 suppression.

541

542 *Perceptual consequences of suppression, and potential for targeted treatment*

543

544 It is generally assumed that clinical suppression results in viewing the world ‘through’ the fellow  
545 eye, with signals from the amblyopic eye being completely suppressed. However, other work has  
546 shown that when signals in the amblyopic eye are boosted by an appropriate amount, information  
547 is still summed binocularly<sup>54</sup>. Indeed, the principle of ocularity invariance (that the world does not  
548 change when one eye is closed) makes it very difficult to distinguish between suppression and  
549 fusion outside of the laboratory or clinic. However, even if the amblyopic eye still contributes to  
550 perception, stereopsis is extremely sensitive to imbalances between the eyes, and breaks down  
551 when one eye receives a stronger input<sup>55</sup>. The two types of suppression we identify here would  
552 likely unbalance signals in exactly this way, which may contribute to the poorer stereopsis for  
553 most of our patients (see Table 1).

554  
555 Consistent with this idea, several treatments have recently been proposed that aim to reduce  
556 suppression between the eyes. For example, antisuppression therapy<sup>56</sup> involves presenting dot  
557 motion stimuli, in which signals are shown to one eye, and noise distractors to the other. To  
558 perform the task, patients must favour information from the signal (amblyopic) eye. Performance  
559 improves over time, implying that suppression is reduced. This approach also improves acuity  
560 and stereopsis, even in amblyopic adults far beyond the critical period (in childhood) for traditional  
561 treatment. Related treatments that involve playing dichoptic video games<sup>57-59</sup>, or watching  
562 dichoptic movies<sup>60</sup>, may work in a similar way. Measuring the two types of suppression identified  
563 here throughout treatment would reveal causal relationships between suppression and visual  
564 function, potentially allowing clinicians to optimise treatment schedules and monitor progress.

## 565 566 **Appendix 1 – details of computational models**

567  
568 The two stage model of Meese et al.<sup>16</sup> comprises an initial stage of monocular gain control,  
569 followed by binocular summation, defined as:

$$570$$
$$571 \text{binsum} = \frac{C_L^m}{S + C_L + \omega_R C_R} + \frac{C_R^m}{S + C_R + \omega_L C_L}$$
$$572$$

573 where  $m = 1.3$ ,  $S = 1$ , and  $\omega_R = \omega_L = 1$ ,  $C_L$  and  $C_R$  are the input contrasts to the left and right eyes.  
574 The output of the model follows a further nonlinearity:

$$575$$
$$576 \text{resp} = \frac{\text{binsum}^p}{Z + \text{binsum}^q}$$
$$577$$

578 where  $p = 8$ ,  $q = 6.5$ , and  $Z = 0.1$ . The predictions shown in Figure 1a are the output of the model  
579 for different combinations of  $C_L$  and  $C_R$ . To predict the effects of attenuating one eye’s input  
580 (Figure 1b), an attenuator parameter<sup>10</sup> is added to one eye’s input:

$$581$$
$$582 \text{binsum} = \frac{aC_L^m}{S + aC_L + \omega_R C_R} + \frac{C_R^m}{S + C_R + \omega_L aC_L}$$
$$583$$

584 where  $a = 0.5$ . Finally, to assess the impact of unbalanced interocular suppression (Figure 1c),  
585 we set  $\omega_R = 2$ , but left  $\omega_L = 1$  (and set  $a = 1$ ). Precise parameter values, e.g. of exponents, are  
586 not essential to produce the overall model behaviour.

587

## 588 References

589

- 590 1. Coutant BE, Westheimer G. Population distribution of stereoscopic ability. *Ophthalmic and*  
591 *Physiological Optics* 1993;13:3–7.
- 592 2. Julesz B. Stereoscopic vision. *Vision Res* 1986;26:1601–1612.
- 593 3. Fu Z, Hong H, Su Z, et al. Global prevalence of amblyopia and disease burden projections through  
594 2040: a systematic review and meta-analysis. *British Journal of Ophthalmology* 2020;104:1164–1170.
- 595 4. Hess RF. Contrast sensitivity assessment of functional amblyopia in humans. *Trans Ophthalmol Soc U*  
596 *K* 1979;99:391–397.
- 597 5. Levi DM. Rethinking amblyopia 2020. *Vision Research* 2020;176:118–129.
- 598 6. Levi DM, Knill DC, Bavelier D. Stereopsis and amblyopia: A mini-review. *Vision Research*  
599 2015;114:17–30.
- 600 7. Jampolsky A. Characteristics of Suppression in Strabismus. *Archives of Ophthalmology* 1955;54:683–  
601 696.
- 602 8. Pratt-Johnson JA, Tillson G. Suppression in strabismus--an update. *British Journal of Ophthalmology*  
603 1984;68:174–178.
- 604 9. Travers T aB. Suppression of vision in squint and its association with retinal correspondence and  
605 amblyopia. *British Journal of Ophthalmology* 1938;22:577–604.
- 606 10. Baker DH, Meese TS, Hess RF. Contrast masking in strabismic amblyopia: attenuation, noise,  
607 interocular suppression and binocular summation. *Vision Res* 2008;48:1625–1640.
- 608 11. Baker DH, Meese TS, Georgeson MA. Binocular interaction: contrast matching and contrast  
609 discrimination are predicted by the same model. *Spatial Vision* 2007;20:397–413.
- 610 12. Levelt WJM. The alternation process in binocular rivalry. *British Journal of Psychology* 1966;57:225–  
611 238.
- 612 13. Ding J, Levi DM. Rebalancing binocular vision in amblyopia. *Ophthalmic and Physiological Optics*  
613 2014;34:199–213.
- 614 14. Baker DH, Simard M, Saint-Amour D, Hess RF. Steady-State Contrast Response Functions Provide  
615 a Sensitive and Objective Index of Amblyopic Deficits. *Investigative Ophthalmology & Visual Science*  
616 2015;56:1208–1216.
- 617 15. Barnes GR, Hess RF, Dumoulin SO, et al. The cortical deficit in humans with strabismic amblyopia.  
618 *The Journal of Physiology* 2001;533:281–297.
- 619 16. Meese TS, Georgeson MA, Baker DH. Binocular contrast vision at and above threshold. *J Vis*  
620 2006;6:1224–1243.
- 621 17. Moradi F, Heeger DJ. Inter-ocular contrast normalization in human visual cortex. *J Vis* 2009;9:13.1-  
622 22.
- 623 18. Baker DH, Wade AR. Evidence for an Optimal Algorithm Underlying Signal Combination in Human  
624 Visual Cortex. *Cerebral Cortex* 2017;27:254–264.
- 625 19. Baker DH, Meese TS, Georgeson MA. Paradoxical Psychometric Functions (“Swan Functions”) are  
626 Explained by Dilution Masking in Four Stimulus Dimensions. *i-Perception* 2013;4:17–35.
- 627 20. Baker DH, Kaestner M, Gouws AD. Measurement of crosstalk in stereoscopic display systems used  
628 for vision research. *Journal of Vision* 2016;16:14.
- 629 21. Brainard DH. The Psychophysics Toolbox. *Spat Vis* 1997;10:433–436.
- 630 22. Kleiner M, Brainard DH, Pelli DG. What’s new in Psychtoolbox-3? *Perception* 2007;36(S):14.
- 631 23. Pelli DG. The VideoToolbox software for visual psychophysics: transforming numbers into movies.  
632 *Spat Vis* 1997;10:437–442.
- 633 24. Dale AM, Fischl B, Sereno MI. Cortical surface-based analysis. I. Segmentation and surface  
634 reconstruction. *Neuroimage* 1999;9:179–194.
- 635 25. Fischl B. FreeSurfer. *Neuroimage* 2012;62:774–781.
- 636 26. Engel SA, Rumelhart DE, Wandell BA, et al. fMRI of human visual cortex. *Nature* 1994;369:525.

- 637 27. Dumoulin SO, Wandell BA. Population receptive field estimates in human visual cortex. *NeuroImage*  
638 2008;39:647–660.
- 639 28. Jenkinson M, Beckmann CF, Behrens TEJ, et al. FSL. *Neuroimage* 2012;62:782–790.
- 640 29. Marcus DS, Harwell J, Olsen T, et al. Informatics and data mining tools and strategies for the human  
641 connectome project. *Front Neuroinform* 2011;5:4.
- 642 30. Delorme A, Makeig S. EEGLAB: an open source toolbox for analysis of single-trial EEG dynamics  
643 including independent component analysis. *J Neurosci Methods* 2004;134:9–21.
- 644 31. Sereno MI, Dale AM, Reppas JB, et al. Borders of Multiple Visual Areas in Humans Revealed by  
645 Functional Magnetic Resonance Imaging. *Science* 1995;268:889–893.
- 646 32. Boynton GM, Engel SA, Glover GH, Heeger DJ. Linear systems analysis of functional magnetic  
647 resonance imaging in human V1. *J Neurosci* 1996;16:4207–4221.
- 648 33. Chadnova E, Reynaud A, Clavagnier S, Hess RF. Latent binocular function in amblyopia. *Vision*  
649 *Research* 2017;140:73–80.
- 650 34. Conner IP, Odom JV, Schwartz TL, Mendola JD. Monocular activation of V1 and V2 in amblyopic  
651 adults measured with functional magnetic resonance imaging. *J AAPOS* 2007;11:341–350.
- 652 35. Li X, Dumoulin SO, Mansouri B, Hess RF. Cortical Deficits in Human Amblyopia: Their Regional  
653 Distribution and Their Relationship to the Contrast Detection Deficit. *Investigative Ophthalmology &*  
654 *Visual Science* 2007;48:1575.
- 655 36. Hess RF, Li X, Lu G, et al. The contrast dependence of the cortical fMRI deficit in amblyopia; a  
656 selective loss at higher contrasts. *Human Brain Mapping* 2010;31:1233–1248.
- 657 37. Itthipuripat S, Sprague TC, Serences JT. Functional MRI and EEG Index Complementary Attentional  
658 Modulations. *The Journal of Neuroscience* 2019;39:6162–6179.
- 659 38. Hermes D, Nguyen M, Winawer J. Neuronal synchrony and the relation between the blood-oxygen-  
660 level dependent response and the local field potential. *PLOS Biology* 2017;15:e2001461.
- 661 39. Kupers ER, Wang HX, Amano K, et al. A non-invasive, quantitative study of broadband spectral  
662 responses in human visual cortex. *PLOS ONE* 2018;13:e0193107.
- 663 40. Bruyns-Haylett M, Luo J, Kennerley AJ, et al. The neurogenesis of P1 and N1: A concurrent  
664 EEG/LFP study. *NeuroImage* 2017;146:575–588.
- 665 41. de Hollander G, van der Zwaag W, Qian C, et al. Ultra-high resolution fMRI reveals origins of  
666 feedforward and feedback activity within laminae of human ocular dominance columns. *BioRxiv*  
667 preprint; 2020. Available at: <http://biorxiv.org/lookup/doi/10.1101/2020.05.19.102186>.
- 668 42. Hirsch JA, Martinez LM, Pillai C, et al. Functionally distinct inhibitory neurons at the first stage of  
669 visual cortical processing. *Nature Neuroscience* 2003;6:1300–1308.
- 670 43. Martinez LM, Wang Q, Reid RC, et al. Receptive field structure varies with layer in the primary visual  
671 cortex. *Nature Neuroscience* 2005;8:372–379.
- 672 44. Harrad RA, Hess RF. Binocular integration of contrast information in amblyopia. *Vision Res*  
673 1992;32:2135–2150.
- 674 45. Huang P-C, Baker DH, Hess RF. Interocular suppression in normal and amblyopic vision: Spatio-  
675 temporal properties. *Journal of Vision* 2012;12:29–29.
- 676 46. Zhou J, Reynaud A, Yao Z, et al. Amblyopic Suppression: Passive Attenuation, Enhanced Dichoptic  
677 Masking by the Fellow Eye or Reduced Dichoptic Masking by the Amblyopic Eye? *Investigative*  
678 *Ophthalmology & Visual Science* 2018;59:4190.
- 679 47. Spiegel DP, Baldwin AS, Hess RF. The Relationship Between Fusion, Suppression, and Diplopia in  
680 Normal and Amblyopic Vision. *Investigative Ophthalmology & Visual Science* 2016;57:5810.
- 681 48. Ding J, Klein SA, Levi DM. Binocular combination in abnormal binocular vision. *Journal of Vision*  
682 2013;13:14.
- 683 49. Sengpiel F, Blakemore C. Interocular control of neuronal responsiveness in cat visual cortex. *Nature*  
684 1994;368:847–850.
- 685 50. Shooner C, Hallum LE, Kumbhani RD, et al. Asymmetric Dichoptic Masking in Visual Cortex of  
686 Amblyopic Macaque Monkeys. *The Journal of Neuroscience* 2017;37:8734–8741.
- 687 51. Carandini M, Heeger DJ. Normalization as a canonical neural computation. *Nat Rev Neurosci*  
688 2012;13:51–62.
- 689 52. Westrick ZM, Heeger DJ, Landy MS. Pattern Adaptation and Normalization Reweighting. *J Neurosci*  
690 2016;36:9805–9816.
- 691 53. Lunghi C, Burr DC, Morrone C. Brief periods of monocular deprivation disrupt ocular balance in  
692 human adult visual cortex. *Current Biology* 2011;21:R538–R539.

- 693 54. Baker DH, Meese TS, Mansouri B, Hess RF. Binocular Summation of Contrast Remains Intact in  
694 Strabismic Amblyopia. *Investigative Ophthalmology & Visual Science* 2007;48:5332.  
695 55. Legge GE, Gu YC. Stereopsis and contrast. *Vision Res* 1989;29:989–1004.  
696 56. Hess RF, Mansouri B, Thompson B. A binocular approach to treating amblyopia: antisuppression  
697 therapy. *Optom Vis Sci* 2010;87:697–704.  
698 57. Backus BT, Dornbos BD, Tran TA, et al. Use of virtual reality to assess and treat weakness in human  
699 stereoscopic vision. *Electronic Imaging* 2018;2018:109-1-109–6.  
700 58. Li J, Thompson B, Deng D, et al. Dichoptic training enables the adult amblyopic brain to learn.  
701 *Current Biology* 2013;23:R308–R309.  
702 59. Vedamurthy I, Nahum M, Bavelier D, Levi DM. Mechanisms of recovery of visual function in adult  
703 amblyopia through a tailored action video game. *Scientific Reports* 2015;5. Available at:  
704 <http://www.nature.com/articles/srep08482>.  
705 60. Bossi M, Tailor VK, Anderson EJ, et al. Binocular Therapy for Childhood Amblyopia Improves Vision  
706 Without Breaking Interocular Suppression. *Invest Ophthalmol Vis Sci* 2017;58:3031–3043.  
707

708 **Online Supplemental materials**  
709

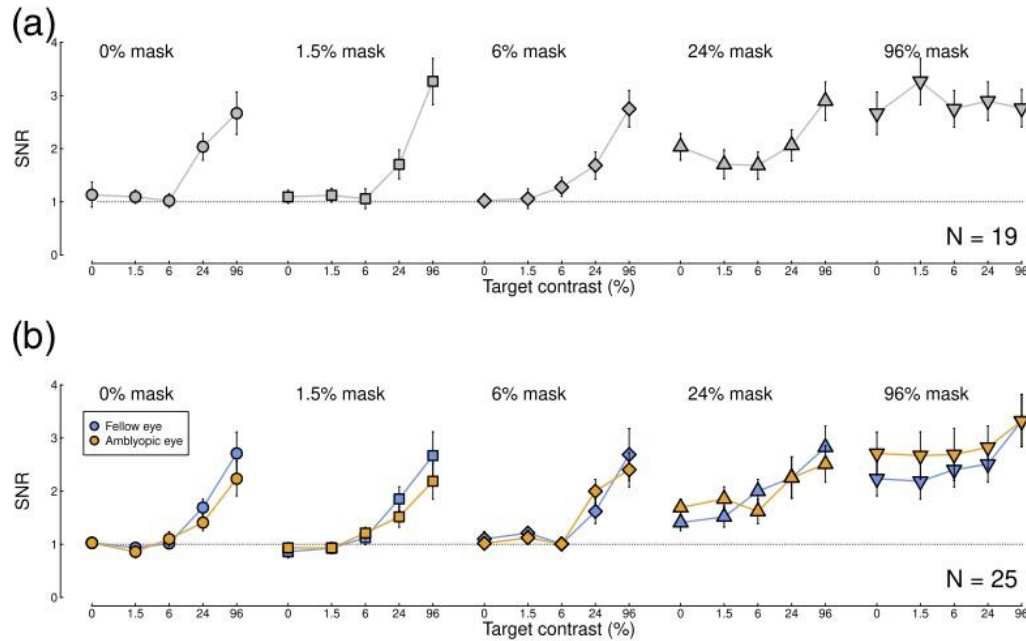

710  
711 Figure S1: SSVEP data for the second harmonic (2F) response. The main trends are the same  
712 as in Figure 5c,d, though the SNRs are overall lower (note y-axis scaling). Panel (a) shows data  
713 from control participants (N=19), and panel (b) shows data from patients (N=25).  
714

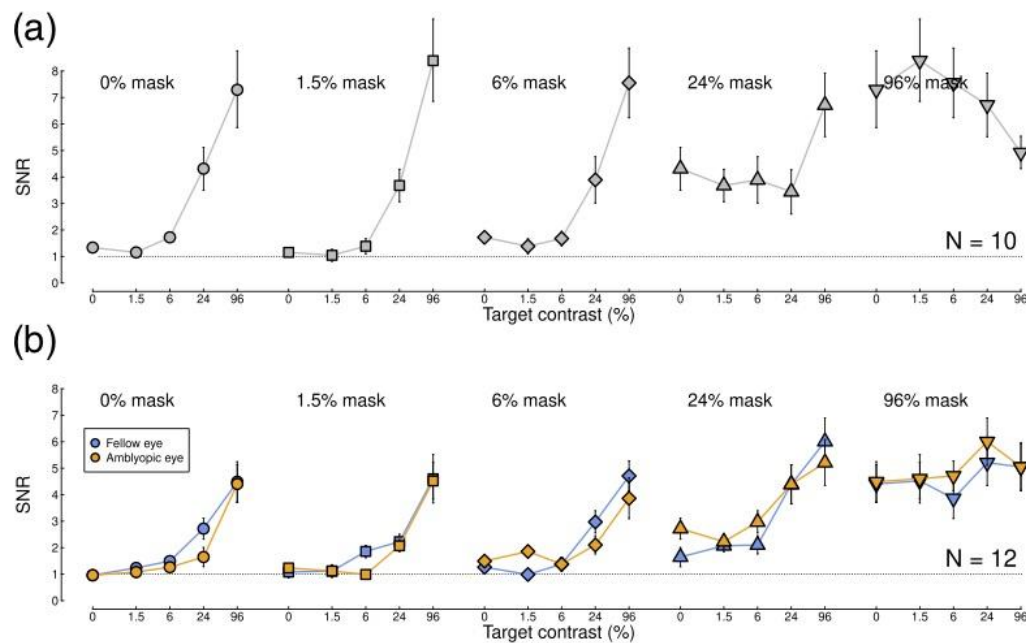

715  
716 Figure S2: SSVEP data for only the participants who completed the fMRI experiment. The main  
717 trends are the same as in Figure 5c,d. Panel (a) shows data from control participants (N=10), and  
718 panel (b) shows data from patients (N=12).
